# Supplementary material
Source: PubMed Central journal article supplement (PMC8729417)
Supplement: CJN.03290321SupplementaryData.pdf [file CJN.03290321SupplementaryData.pdf]

## Supplemental Material

### FIGURES

1. **Flow chart**
2. **Supplemental Figure 1.** Incidence (percentage) of delayed graft function according to the clamping (A) declamping (B) time of the kidney transplant. Each cross corresponds to a 2-hour period.

### TABLES

1. **Supplemental Table 1.** Multivariate logistic model regarding the risk of Delayed Graft Function (DGF) Declamping time categorized in 2 categories: 0-12 AM versus 0-12 PM.
2. **Supplemental Table 2.** Multivariate linear model studying the one-year renal function after transplantation. Clamping time categorized in 2 categories: 0-12 AM versus 0-12 PM.
3. **Supplemental Table 3.** Multivariate linear model studying the one-year renal function after transplantation. Declamping time categorized in 2 categories: 0-12 AM versus 0-12 PM.
4. **Supplemental Table 4.** Multivariable Cox model studying the risk of death or graft failure. Declamping time categorized in 2 categories: 0-12 AM versus 0-12 PM.
5. **Supplemental Table 5.** Multivariable Cox model studying the risk of graft failure. Declamping time categorized in 2 categories: 0-12 AM versus 0-12 PM.
6. **Supplemental Table 6.** Multivariable Cox model studying the risk of acute rejection. Clamping time categorized in 2 categories: 0-12 AM versus 0-12 PM.
7. **Supplemental Table 7.** Multivariable Cox model studying the risk of acute rejection. Declamping time categorized in 2 categories: 0-12 AM versus 0-12 PM.

**Flowchart**

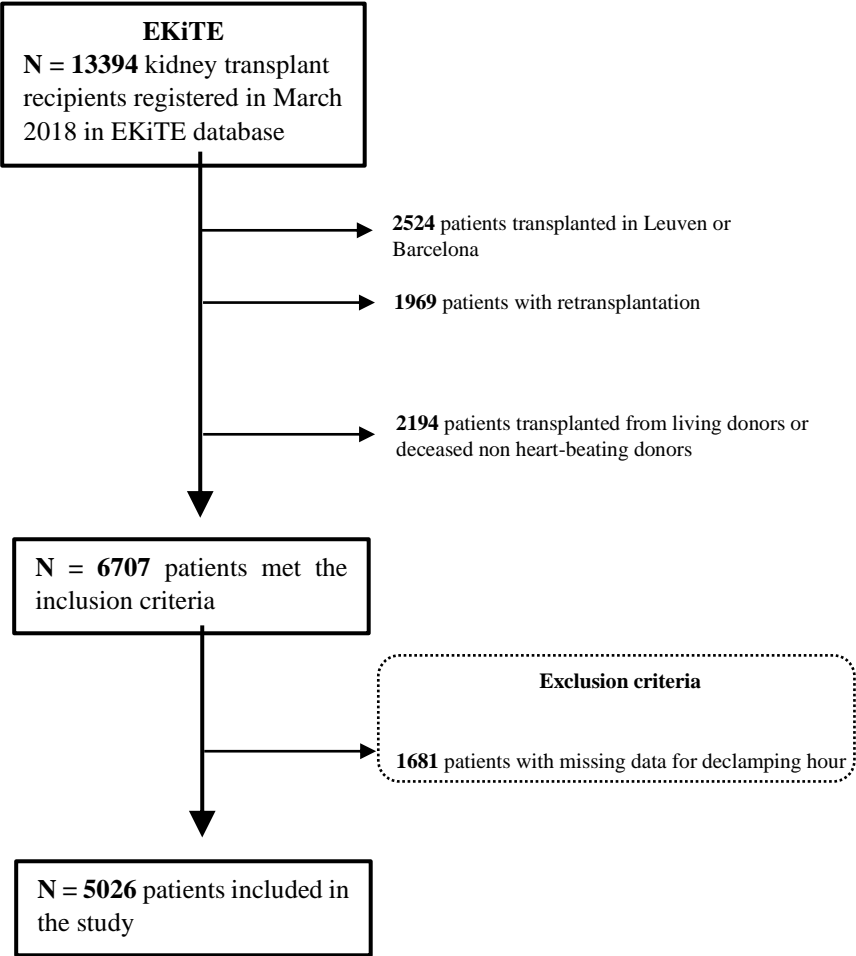

**Supplemental figure 1.** Incidence (percentage) of delayed graft function according to the clamping (A) declamping (B) time of the kidney transplant. Each cross corresponds to a 2-hour period.

**A**

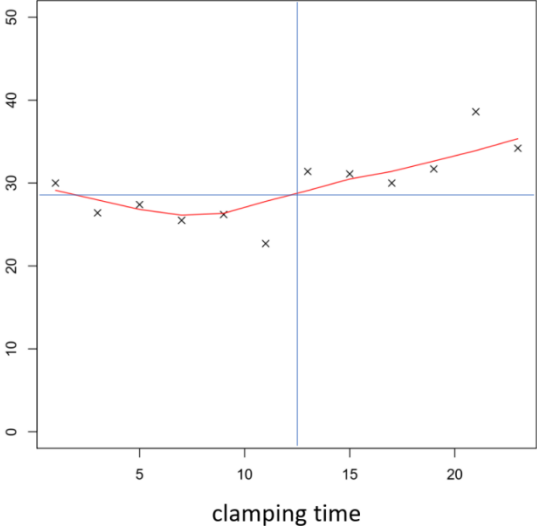

**B**

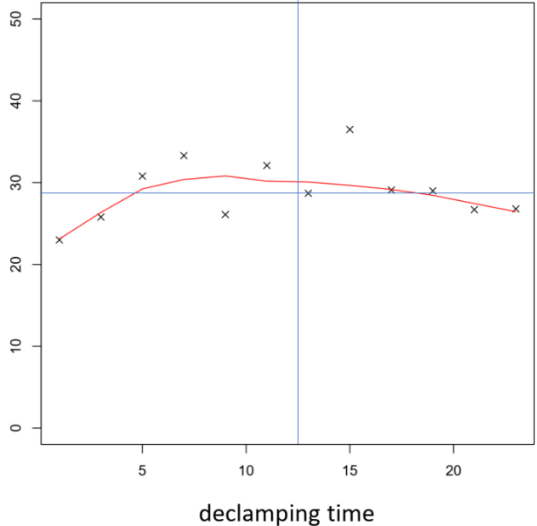

**Supplemental Table 1**

**MULTIVARIATE LOGISTIC MODEL (N = 2886) REGARDING THE RISK OF DELAYED GRAFT FUNCTION (DGF) AND ADJUSTED ON CENTER. DECLAMPING TIME CATEGORIZED IN 2 CATEGORIES: 0-12 AM (N=612) VERSUS 0-12 PM (N=2274).**

|                                        | <b>n (%)</b> | <b>OR [95% CI]</b> | <b>p-value</b> |
|----------------------------------------|--------------|--------------------|----------------|
| <b>Time of declamping</b>              |              |                    | 0.48           |
| Afternoon (00h-12h pm)                 | 183 (30)     | 1 (ref)            |                |
| Morning (00h-12h am)                   | 672 (27)     | 0.92 [0.74 ; 1.15] |                |
| <b>Recipient gender</b>                |              |                    | 0.001          |
| Female                                 | 268 (26)     | 1 (ref)            |                |
| Male                                   | 587 (32)     | 1.38 [1.14 ; 1.67] |                |
| <b>History of diabetes</b>             |              |                    | 0.28           |
| No diabetes                            | 644 (28)     | 1 (ref)            |                |
| Diabetes                               | 211 (34)     | 0.89 [0.71 ; 1.11] |                |
| <b>History of vascular disease</b>     |              |                    | 0.01           |
| No vascular disease                    | 653 (28)     | 1 (ref)            |                |
| Vascular disease                       | 202 (40)     | 1.32 [1.06 ; 1.66] |                |
| <b>History of cardiac disease</b>      |              |                    | 0.002          |
| No cardiac disease                     | 522 (26)     | 1 (ref)            |                |
| Cardiac disease                        | 333 (39)     | 1.37 [1.13 ; 1.67] |                |
| <b>Recipient blood group</b>           |              |                    | 0.04           |
| A                                      | 331(27)      | 1 (ref)            |                |
| AB                                     | 45 (34)      | 1.30 [0.85 ; 1.98] |                |
| B                                      | 97 (29)      | 1.15 [0.85 ; 1.54] |                |
| O                                      | 382 (32)     | 1.32 [1.09 ; 1.61] |                |
| <b>Donor cause of death</b>            |              |                    | 0.20           |
| Other                                  | 346 (28)     | 1 (ref)            |                |
| Vascular cause                         | 509 (31)     | 1.14 [0.94 ; 1.38] |                |
| <b>Donor CMV serology</b>              |              |                    | 0.23           |
| Negative                               | 386 (32)     | 1 (ref)            |                |
| Positive                               | 469(28)      | 0.89 [0.75 ; 1.07] |                |
| <b>HLA-A-B-DR incompatibilities</b>    |              |                    | 0.03           |
| <4                                     | 404 (27)     | 1 (ref)            |                |
| ≥4                                     | 451 (32)     | 1.32 [1.03 ; 1.68] |                |
| <b>Recipient BMI (kg.m-2)</b>          |              | 1.07 [1.05 ; 1.09] | <0.001         |
| <b>Donor age (years)</b>               |              | 1.01 [1.00 ; 1.02] | 0.001          |
| <b>Donor creatininemia (en μmol/l)</b> |              | 1.01 [1.00 ; 1.01] | <0.001         |
| <b>Cold ischemia time (hours)</b>      |              | 1.05 [1.04 ; 1.07] | <0.001         |

BMI, body mass index; CMV, cytomegalovirus; HLA, human leucocyte antigens; CI, confidence interval; OR, odds ratio.

## Supplemental Table 2

TABLE. MULTIVARIATE LINEAR MODEL (N = 2648) STUDYING THE ONE-YEAR RENAL FUNCTION AFTER TRANSPLANTATION. CLAMPING TIME CATEGORIZED IN 2 CATEGORIES: 0-12 AM (N=1842) VERSUS 0-12 PM (N=806).

|                                        | Coefficient [95% CI]    | p-value |
|----------------------------------------|-------------------------|---------|
| <b>Time of clamping</b>                |                         | 0.08    |
| Afternoon (00h-12h pm)                 | 1 (ref)                 |         |
| Morning (00h-12h am)                   | 1.21 [-0.14 ; 2.57]     |         |
| <b>Recipient gender</b>                |                         | 0.03    |
| Female                                 | 1 (ref)                 |         |
| Male                                   | 1.46 [0.16 ; 2.76]      |         |
| <b>History of diabetes</b>             |                         | 0.23    |
| No diabetes                            | 1 (ref)                 |         |
| Diabetes                               | 1.02 [-0.64 ; 2.68]     |         |
| <b>History of vascular disease</b>     |                         | 0.47    |
| No vascular disease                    | 1 (ref)                 |         |
| Vascular disease                       | 0.64 [-1.10 ; 2.38]     |         |
| <b>History of malignancy</b>           |                         | 0.15    |
| No cancer                              | 1 (ref)                 |         |
| Cancer                                 | -1.54 [-3.62 ; 0.53]    |         |
| <b>Donor gender</b>                    |                         | <0.001  |
| Female                                 | 1 (ref)                 |         |
| Male                                   | 2.37 [1.06 ; 3.68]      |         |
| <b>Donor cause of death</b>            |                         | <0.001  |
| Other                                  | 1 (ref)                 |         |
| Vascular cause                         | -2.64 [-4.00 ; -1.28]   |         |
| <b>Vasoactive drugs</b>                |                         | 0.01    |
| No                                     | 1 (ref)                 |         |
| Yes                                    | 2.82 [0.71 ; 4.92]      |         |
| <b>Induction therapy</b>               |                         | 0.002   |
| No induction or no depleting           | 1 (ref)                 |         |
| Depleting induction                    | -2.36 [-3.87 ; -0.86]   |         |
| <b>1-year ARE</b>                      |                         | <0.001  |
| No                                     | 1 (ref)                 |         |
| Yes                                    | -10.17 [-11.96 ; -8.38] |         |
| <b>Recipient age (years)</b>           | 0.11 [0.03 ; 0.19]      | 0.01    |
| <b>Recipient BMI (kg.m-2)</b>          | -0.29 [-0.43 ; -0.15]   | <0.001  |
| <b>Donor age (years)</b>               | -0.59 [-0.66 ; -0.52]   | <0.001  |
| <b>Donor creatininemia (en µmol/l)</b> | -0.01 [-0.03 ; 0.00]    | 0.01    |

BMI, body mass index; CI, confidence interval.

### Supplemental Table 3

TABLE. MULTIVARIATE LINEAR MODEL (N = 2653) STUDYING THE ONE-YEAR RENAL FUNCTION AFTER TRANSPLANTATION. DECLAMPING TIME CATEGORIZED IN 2 CATEGORIES: 0-12 AM (N=543) VERSUS 0-12 PM (N=2110).

|                                                     | Coefficient [95% CI]    | p-value |
|-----------------------------------------------------|-------------------------|---------|
| <b>Time of declamping</b>                           |                         | 0.81    |
| Afternoon (00h-12h pm)                              | 1 (ref)                 |         |
| Morning (00h-12h am)                                | -0.19 [-1.73 ; 1.34]    |         |
| <b>Recipient gender</b>                             |                         | 0.03    |
| Female                                              | 1 (ref)                 |         |
| Male                                                | 1.46 [0.17 ; 2.76]      |         |
| <b>History of diabetes</b>                          |                         | 0.25    |
| No diabetes                                         | 1 (ref)                 |         |
| Diabetes                                            | 0.98 [-0.68 ; 2.63]     |         |
| <b>History of vascular disease</b>                  |                         | 0.48    |
| No vascular disease                                 | 1 (ref)                 |         |
| Vascular disease                                    | 0.63 [-1.11 ; 2.36]     |         |
| <b>History of malignancy</b>                        |                         | 0.16    |
| No cancer                                           | 1 (ref)                 |         |
| Cancer                                              | -1.48 [-3.55 ; 0.60]    |         |
| <b>Donor gender</b>                                 |                         | <0.001  |
| Female                                              | 1 (ref)                 |         |
| Male                                                | 2.37 [1.06 ; 3.68]      |         |
| <b>Donor cause of death</b>                         |                         | <0.001  |
| Other                                               | 1 (ref)                 |         |
| Vascular cause                                      | -2.66 [-4.02 ; -1.31]   |         |
| <b>Vasoactive drugs</b>                             |                         | 0.01    |
| No                                                  | 1 (ref)                 |         |
| Yes                                                 | 2.77 [0.67 ; 4.87]      |         |
| <b>Induction therapy</b>                            |                         | 0.002   |
| No induction or no depleting                        | 1 (ref)                 |         |
| Depleting induction                                 | -2.39 [-3.89 ; -0.88]   |         |
| <b>1-year ARE</b>                                   |                         | <0.001  |
| No                                                  | 1 (ref)                 |         |
| Yes                                                 | -10.19 [-11.97 ; -8.41] |         |
| <b>Recipient age (years)</b>                        | 0.11 [0.03 ; 0.19]      | 0.01    |
| <b>Recipient BMI (kg.m-2)</b>                       | -0.29 [-0.43 ; -0.15]   | <0.001  |
| <b>Donor age (years)</b>                            | -0.59 [-0.66 ; -0.52]   | <0.001  |
| <b>Donor creatinemia (en <math>\mu</math>mol/l)</b> | -0.01 [-0.03 ; 0.00]    | 0.01    |

BMI, body mass index; CI, confidence interval.

## Supplemental Table 4

**TABLE RESULTS OF THE MULTIVARIABLE COX MODEL (N = 4791) STUDYING THE RISK OF DEATH OR GRAFT FAILURE (1088 OBSERVED DURING THE FOLLOW-UP) AND STRATIFIED ON CENTER. DECLAMPING TIME CATEGORIZED IN 2 CATEGORIES: 0-12 AM (N=1189) VERSUS 0-12 PM (N=3602).**

|                                                    | HR [95% CI]        | p-value |
|----------------------------------------------------|--------------------|---------|
| <b>Time of declamping</b>                          |                    | 0.56    |
| Afternoon (00h-12h pm)                             | 1 (ref)            |         |
| Morning (00h-12h am)                               | 1.04 [0.91 ; 1.19] |         |
| <b>Recipient gender</b>                            |                    | 0.009   |
| Female                                             | 1 (ref)            |         |
| Male                                               | 1.20 [1.05 ; 1.37] |         |
| <b>Type of dialysis before the transplantation</b> |                    | <0.001  |
| Hemodialysis or peritoneal dialysis                | 1 (ref)            |         |
| Preemptive                                         | 0.69 [0.57 ; 0.84] |         |
| <b>History of diabetes</b>                         |                    | 0.001   |
| No diabetes                                        | 1 (ref)            |         |
| Diabetes                                           | 1.29 [1.12 ; 1.48] |         |
| <b>History of vascular disease</b>                 |                    | <0.001  |
| No vascular disease                                | 1 (ref)            |         |
| Vascular disease                                   | 1.48 [1.27 ; 1.72] |         |
| <b>History of cardiac disease</b>                  |                    | 0.06    |
| No cardiac disease                                 | 1 (ref)            |         |
| Cardiac disease                                    | 1.14 [0.99 ; 1.30] |         |
| <b>History of malignancy</b>                       |                    | 0.005   |
| No cancer                                          | 1 (ref)            |         |
| Cancer                                             | 1.29 [1.08 ; 1.54] |         |
| <b>Donor gender</b>                                |                    | 0.40    |
| Female                                             | 1 (ref)            |         |
| Male                                               | 0.95 [0.84 ; 1.07] |         |
| <b>Donor cause of death</b>                        |                    | 0.31    |
| Other                                              | 1 (ref)            |         |
| Vascular cause                                     | 1.07 [0.94 ; 1.23] |         |
| <b>Donor CMV serology</b>                          |                    | 0.12    |
| Negative                                           | 1 (ref)            |         |
| Positive                                           | 1.11 [0.97 ; 1.26] |         |
| <b>Recipient age (years)</b>                       | 1.60 [1.36 ; 1.88] | <0.001  |
| <b>Donor age ≥55 years</b>                         | 1.36 [1.17 ; 1.58] | <0.001  |
| <b>Recipient BMI (kg.m-2)</b>                      | 1.01 [1.00 ; 1.02] | 0.10    |

BMI, body mass index; CMV, cytomegalovirus; CI, confidence interval; HR, hazard ratio.

## Supplemental Table 5

TABLE: RESULTS OF THE MULTIVARIABLE COX MODEL (N = 4831) STUDYING THE RISK OF GRAFT FAILURE (542 OBSERVED DURING THE FOLLOW-UP) AND STRATIFIED ON CENTER. DECLAMPING TIME CATEGORIZED IN 2 CATEGORIES: 0-12 AM (N=1207) VERSUS 0-12 PM (N=3624).

|                                                    | n (%) / m (SD) | HR [CI95%]         | p-value |
|----------------------------------------------------|----------------|--------------------|---------|
| <b>Time of Declamping</b>                          |                |                    | 0.47    |
| 00h -12h pm                                        | 3624 (75)      | 1 (ref)            |         |
| 00h - 12h am                                       | 1207 (25)      | 1.07 [0.88 ; 1.30] |         |
| <b>Type of dialysis before the transplantation</b> |                |                    | 0.01    |
| Hemodialysis or peritoneal dialysis                | 4170 (86)      | 1 (ref)            |         |
| Preemptive                                         | 661 (14)       | 0.69 [0.52 ; 0.92] |         |
| <b>History of diabetes</b>                         |                |                    | 0.002   |
| No diabetes                                        | 3839 (79)      | 1 (ref)            |         |
| Diabetes                                           | 992 (21)       | 1.37 [1.12 ; 1.68] |         |
| <b>History of vascular disease</b>                 |                |                    | 0.003   |
| No vascular disease                                | 4090 (85)      | 1 (ref)            |         |
| Vascular disease                                   | 741 (15)       | 1.40 [1.12 ; 1.74] |         |
| <b>History of malignancy</b>                       |                |                    | 0.001   |
| No cancer                                          | 4340 (90)      | 1 (ref)            |         |
| Cancer                                             | 491 (10)       | 1.55 [1.21 ; 1.99] |         |
| <b>HLA-A-B-DR incompatibilities</b>                |                |                    | 0.01    |
| <4                                                 | 2623 (54)      | 1 (ref)            |         |
| ≥4                                                 | 2208 (46)      | 1.36 [1.08 ; 1.72] |         |
| <b>Recipient age (years)</b>                       | 55 (14)        | 0.75 [0.61 ; 0.94] | 0.01    |
| <b>Recipient BMI (kg.m-2)</b>                      | 25.6 (5.0)     | 1.01 [1.00 ; 1.03] | 0.09    |
| <b>Donor age (years)</b>                           | 55 (17)        | 1.02 [1.02 ; 1.03] | <0.001  |

BMI, body mass index; HLA, human leucocyte antigens; CI, confidence interval; HR, hazard ratio.



## Supplemental Table 6

**TABLE: RESULTS OF THE MULTIVARIABLE COX MODEL (N = 4661) STUDYING THE RISK OF ACUTE REJECTION (765 OBSERVED DURING THE FOLLOW-UP) AND STRATIFIED ON CENTER. CLAMPING TIME CATEGORIZED IN 2 CATEGORIES: 0-12 AM (N=3006) VERSUS 0-12 PM (N=1655).**

|                                          | HR [95% CI]        | p-value |
|------------------------------------------|--------------------|---------|
| <b>Time of clamping</b>                  |                    | 0.32    |
| Afternoon (00h-12h pm)                   | 1 (ref)            |         |
| Morning (00h-12h am)                     | 0.92 [0.79 ; 1.08] |         |
| <b>Donor cause of death</b>              |                    | 0.004   |
| Other                                    | 1 (ref)            |         |
| Vascular cause                           | 1.26 [1.08 ; 1.46] |         |
| <b>HLA-A-B-DR incompatibilities</b>      |                    | 0.003   |
| <4                                       | 1 (ref)            |         |
| ≥4                                       | 1.34 [1.11 ; 1.62] |         |
| <b>Induction therapy</b>                 |                    | <0.001  |
| No induction or no depleting             | 1 (ref)            |         |
| Depleting induction                      | 1.59 [1.35 ; 1.88] |         |
| <b>Recipient age (years)</b>             | 0.99 [0.99 ; 1.00] | 0.003   |
| <b>Duration on waiting list (months)</b> | 1.00 [0.99 ; 1.00] | 0.07    |

HLA, human leucocyte antigens; CI, confidence interval; HR, hazard ratio.

## Supplemental Table 7

TABLE: RESULTS OF THE MULTIVARIABLE COX MODEL (N = 4677) STUDYING THE RISK OF ACUTE REJECTION (768 OBSERVED DURING THE FOLLOW-UP) AND STRATIFIED ON CENTER. DECLAMPING TIME CATEGORIZED IN 2 CATEGORIES: 0-12 AM (N=1177) VERSUS 0-12 PM (N=3500).

|                                          | HR [95% CI]        | p-value |
|------------------------------------------|--------------------|---------|
| <b>Time of declamping</b>                |                    | 0.79    |
| Afternoon (00h-12h pm)                   | 1 (ref)            |         |
| Morning (00h-12h am)                     | 1.02 [0.86 ; 1.22] |         |
| <b>Donor cause of death</b>              |                    | 0.003   |
| Other                                    | 1 (ref)            |         |
| Vascular cause                           | 1.26 [1.08 ; 1.47] |         |
| <b>HLA-A-B-DR incompatibilities</b>      |                    | 0.003   |
| <4                                       | 1 (ref)            |         |
| ≥4                                       | 1.34 [1.10 ; 1.62] |         |
| <b>Induction therapy</b>                 |                    | <0.001  |
| No induction or no depleting             | 1 (ref)            |         |
| Depleting induction                      | 1.59 [1.35 ; 1.87] |         |
| <b>Recipient age (years)</b>             | 0.99 [0.99 ; 1.00] | 0.002   |
| <b>Duration on waiting list (months)</b> | 1.00 [0.99 ; 1.00] | 0.10    |

HLA, human leucocyte antigens; CI, confidence interval; HR, hazard ratio.
